# Supplementary material for: Complex Three-Dimensional Co3O4 Nano-Raspberry: Highly Stable and Active Low-temperature CO Oxidation Catalyst
Source: MDPI journal article supplement (doi:10.3390/nano8090662), 2018-08-26
Supplement: s1 [file s1]

### Supporting information

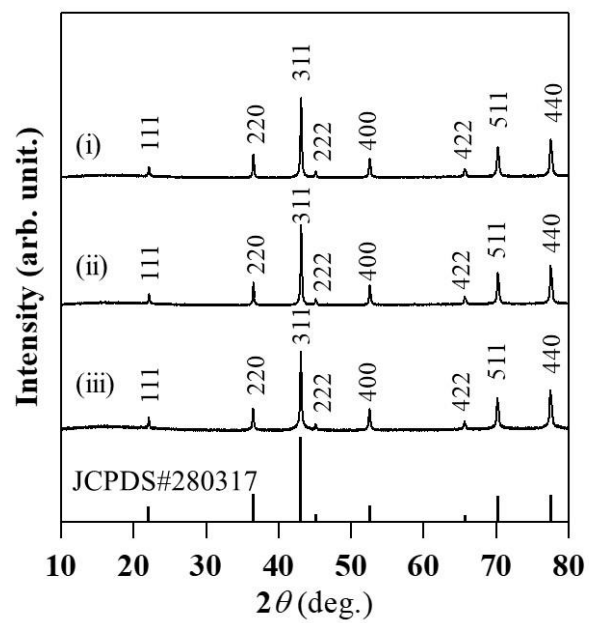

**Figure S1.** XRD patterns of (i) randomly shaped, (ii) cube-like, and (iii) raspberry-shaped  $\text{Co}_3\text{O}_4$  nanoparticles recovered after CO oxidation tests.
